# Supplementary material
Source: ML conference proceedings conference paper supplement (https://proceedings.neurips.cc/paper_files/paper/2022/hash/62891522c00cf7323cbacb500e6cfc8d-Abstract.html)
Supplement: Supplementary file 1 [file 62891522c00cf7323cbacb500e6cfc8d-Supplemental-Conference.zip]

Archive with 10 entries (9 files):
- Logical_Credal_Networks_NeurIPS2022_Supplementary/
- __MACOSX/._Logical_Credal_Networks_NeurIPS2022_Supplementary
- Logical_Credal_Networks_NeurIPS2022_Supplementary/.DS_Store
- __MACOSX/Logical_Credal_Networks_NeurIPS2022_Supplementary/._.DS_Store
- Logical_Credal_Networks_NeurIPS2022_Supplementary/Logical_Credal_Networks_NeurIPS2022_Sup.pdf
- __MACOSX/Logical_Credal_Networks_NeurIPS2022_Supplementary/._Logical_Credal_Networks_NeurIPS2022_Sup.pdf
- Logical_Credal_Networks_NeurIPS2022_Supplementary/LCN_data.zip
- __MACOSX/Logical_Credal_Networks_NeurIPS2022_Supplementary/._LCN_data.zip
- Logical_Credal_Networks_NeurIPS2022_Supplementary/LCN_code.zip
- __MACOSX/Logical_Credal_Networks_NeurIPS2022_Supplementary/._LCN_code.zip
